# Supplementary material for: Copper metal organic framework as natural oxidase mimic for effective killing of Gram-negative and Gram-positive bacteria
Source: Royal Society of Chemistry journal article supplement (doi:10.1039/d2nr01673g), 2022-01-01
Supplement: d2nr01673g1.pdf [file d2nr01673g1.pdf]

## Supporting Information

### **Copper metal organic framework as natural oxidase mimic for effective killing of gram- negative and gram-positive bacteria**

Zhihui Mao<sup>1,2†</sup>, Jie Chen<sup>2,3†</sup>, Yindian Wang<sup>2</sup>, Junjie Xia<sup>2</sup>, Yajing Zhang<sup>4</sup>, Weiwen Zhang<sup>4</sup>, Han Zhu<sup>2</sup>, Xiaojun Hu<sup>2,\*</sup>, Hongxia Chen<sup>2,\*</sup>

<sup>1</sup> School of Environmental and Chemical Engineering, Shanghai University, Shanghai 200444, China

<sup>2</sup> School of Life Sciences, Shanghai University, Shanghai, 200444, China

<sup>3</sup> School of Medicine, Shanghai University, Shanghai, 200444, China

<sup>4</sup> School of Qianweichang, Shanghai University, Shanghai, 200444, China

† Zhihui Mao and Jie Chen contributed equally to this work

---

\*Corresponding author.

E-mail addresses: [hxchen@shu.edu.cn](mailto:hxchen@shu.edu.cn) (H. Chen). [xjhu11@shu.edu.cn](mailto:xjhu11@shu.edu.cn) (X. Hu)

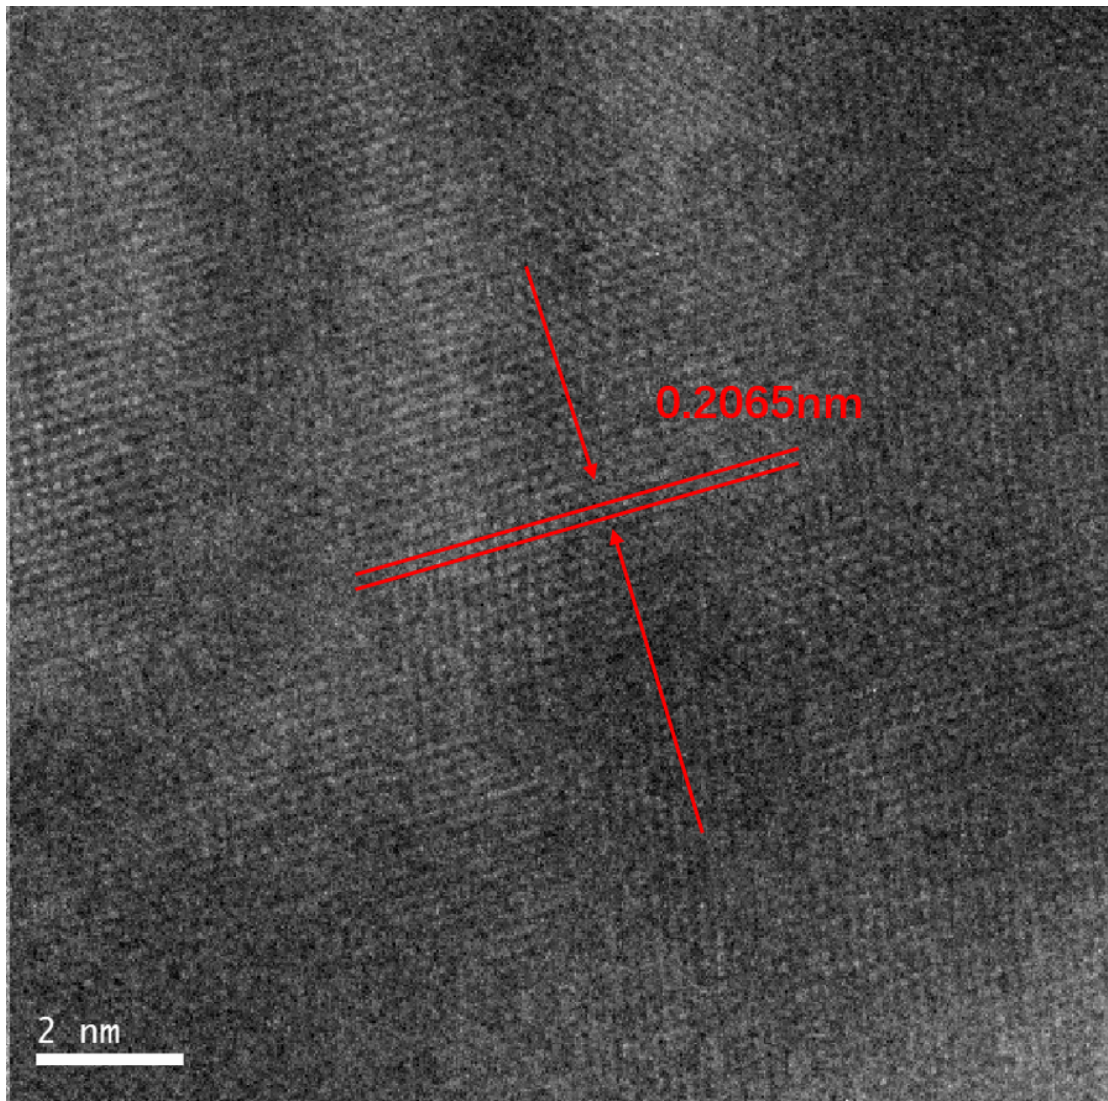

Fig. S1 HRTEM image of Cu-MOFs with measured d-spacings of 0.2065 nm.

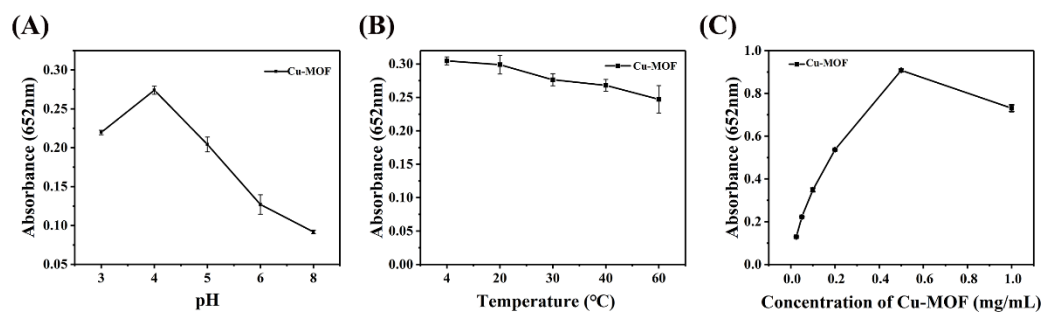

Fig. S2 (A) PH-dependent spectra of TMB catalyzed by Cu-MOFs. (B) Absorption spectra of TMB catalyzed by Cu-MOFs with different reaction temperature. (C) Absorption spectra of TMB catalyzed by different concentration of Cu-MOFs.

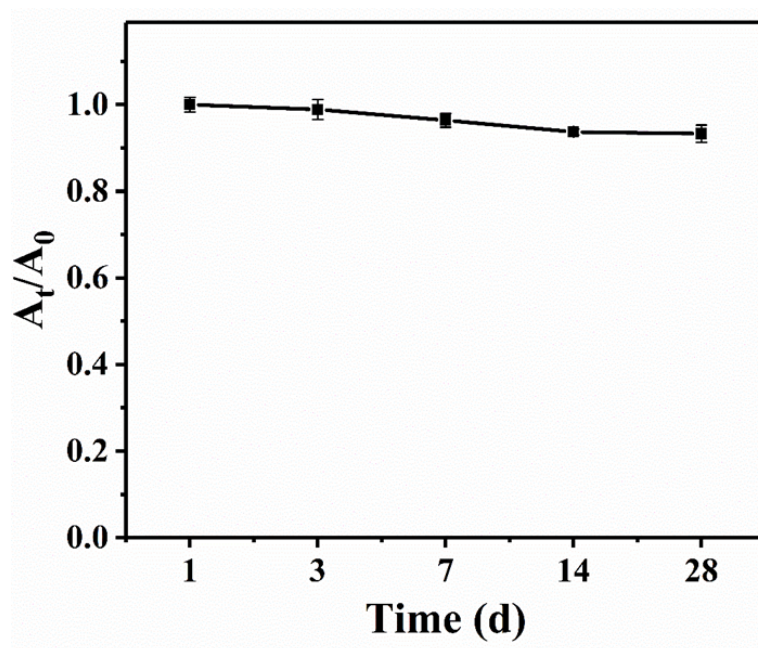

Fig. S3 Time stability tests of TMB catalyzed by Cu-MOFs.

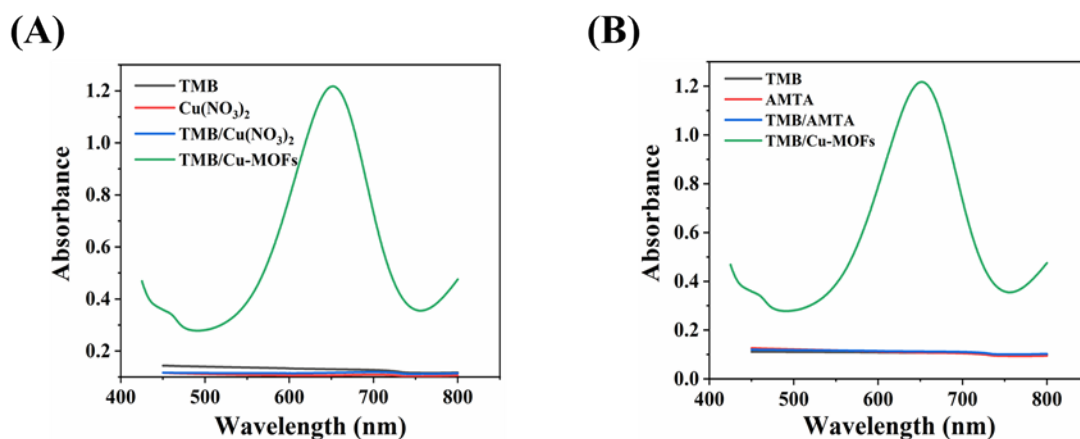

Fig. S4 The UV-vis spectra of TMB in the presence of Cu(NO<sub>3</sub>)<sub>2</sub> (A) and AMTA (B).

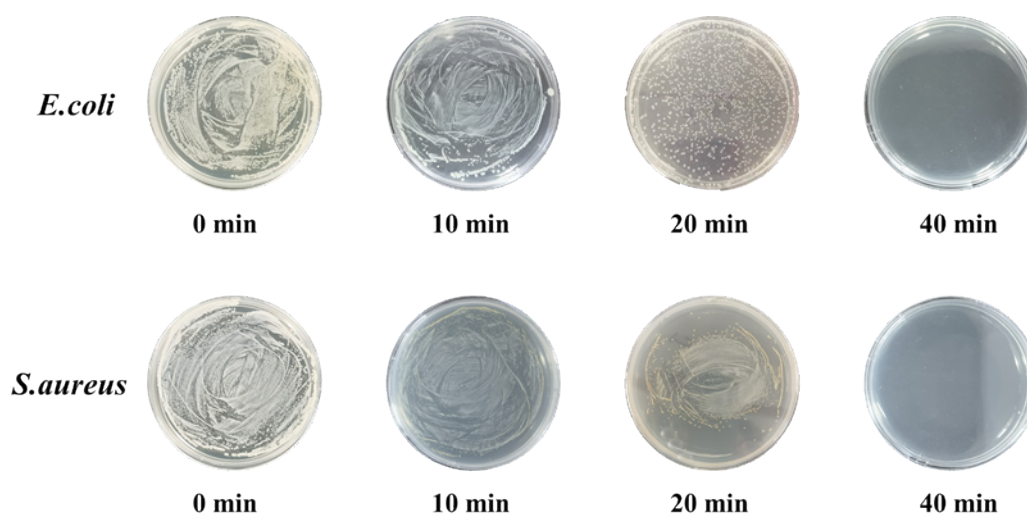

Fig. S5 Antibacterial performance towards *E. coli* and *S. aureus* of Cu-MOFs (12.5 µg/mL) with the time from 0 to 40 min.

Table. S1. Comparison of the Michaelis–Menten constant (Km) and the Maximum Reaction Velocity (Vmax) Of this works with other nanomaterials with oxidase-like activity.

| Catalysts                                                 | Km (mM) | Vmax ( $10^{-7} \text{ M}\cdot\text{S}^{-1}$ ) | Reference |
|-----------------------------------------------------------|---------|------------------------------------------------|-----------|
| Co <sub>4</sub> S <sub>3</sub> / Co(OH) <sub>2</sub> HNTs | 1.33    | 4.66                                           | [1]       |
| CeO <sub>2</sub> NPs                                      | 3.8     | 7                                              | [2]       |
| nanoceria (isPNC/ isDNC)                                  | 3.8/1.8 | 7/5                                            | [2]       |
| Au nanoparticles                                          | 4.73    | 6.8                                            | [3]       |
| MnO <sub>2</sub> nanowire                                 | 49.1    | 73.5                                           | [4]       |
| Cu-MOF                                                    | 1.09    | 170.6                                          | This work |

## Reference

- [1] J. Wang, Y. Wang, D. Zhang, C. Chen, *ACS Applied Materials & Interfaces* **2020**, 12, 29614-29624.
- [2] A. Asati, S. Santra, C. Kaittanis, S. Nath, J. Perez, Manuel, *Angewandte Chemie* **2010**, 121, 2344.
- [3] X. Zheng, Q. Liu, C. Jing, Y. Li, C. Fan, *Angewandte Chemie* **2011**, 50, 11994.
- [4] Y. Wan, P. Qi, D. Zhang, J. Wu, Y. Wang, *Biosensors and Bioelectronics* **2012**, 33, 69-74,
